# Supplementary material for: Performance evaluation of high-volume electret filter air samplers in aerosol microbiome research
Source: PubMed Central journal article supplement (PMC8067322; doi:10.1186/s40793-020-00362-x), 2020-07-28
Supplement: 40793_2020_362_MOESM1_ESM.pdf [file 40793_2020_362_MOESM1_ESM.pdf]

## **Supplementary Text 1.** Aerosol chamber-based benchmarking of reference samplers.

### **Aim**

Benchmark three reference air samplers (SKC BioSampler, gelatin filters, and isopore membrane filters) commonly used in aerosol chamber testing.

### **Method**

The sampling efficiency of isopore membrane filters (Millipore DTTP0047, pore size 0.6  $\mu\text{m}$ ), gelatin filters (Sartorius 12602-47-ALK) and the SKC BioSampler (SKC 225-9595) was tested in the aerosol chamber using FluoSpheres (1  $\mu\text{m}$ ; 3.7  $\mu\text{m}$ ; ThermoFisher F8823 and F8859) and polystyrene latex beads (8  $\mu\text{m}$ ; Merck 78511). The spray solution was made by mixing 1  $\mu\text{m}$  (50  $\mu\text{l}$ ), 3.7  $\mu\text{m}$  (1 ml) and 8  $\mu\text{m}$  (2 ml) beads in MQ water to a final volume of 10 ml. A Hudson medical nebulizer, generated aerosols for 3 minutes before aerosols were allowed to homogenize for 1 minute. Aerosol collection with gelatin and isopore membrane filters was performed as described in “Aerosol collection” with a flowrate of 15 LPM. The SKC BioSampler was filled with 20 ml PBSTA buffer and sampled at 12.5 LPM. The sampling time was set to 10 minutes, and the experiments were repeated six times for each particle size. After sampling, filters were treated as described in “Manual filter extraction”, except the isopore membrane filters were vortexed at maximum speed for 30 seconds to wash microspheres off the filter. Sampling buffer from the SKC BioSampler was transferred to a 50 ml PP tube. Quantification was performed with a BD Accuri C6 flow cytometer (BD Biosciences, NJ, USA).

### **Results**

Gelatin filters were used as a reference, and relative sampling efficiency (%) for SKC BioSampler and isopore membrane filters was therefore expressed relative to gelatin filters. The sampling efficiency for isopore membrane filters was 98-100% for all particle sizes, and 72-86% for the SKC BioSampler (Supplementary Text 1 Table 1).

The sampling efficiency was significantly different between isopore membrane filters and SKC BioSampler for all particle sizes (1  $\mu\text{m}$ ,  $P = 0.009$ ; 3.7  $\mu\text{m}$ ,  $P = <0.001$ ; 8  $\mu\text{m}$ ,  $P = 0.035$ ).

**Supplementary Text 1 Table 1.** Sampling efficiencies (%) for isopore membrane filters and SKC BioSampler relative to gelatin filters.

|                                 | <b>1 <math>\mu\text{m}</math></b> | <b>3.7 <math>\mu\text{m}</math></b> | <b>8 <math>\mu\text{m}</math></b> |
|---------------------------------|-----------------------------------|-------------------------------------|-----------------------------------|
| <b>Isopore membrane filters</b> | 98 $\pm$ 8%                       | 98 $\pm$ 8%                         | 100 $\pm$ 13%                     |
| <b>SKC BioSampler</b>           | 86 $\pm$ 2%                       | 72 $\pm$ 7%                         | 82 $\pm$ 9%                       |

**Supplementary Text 2.** Aerosol chamber-based evaluation of SASS 3100 sampling efficiency as a function of sampling flowrate.

### **Aim**

Evaluate sampling efficiency of SASS 3100 at different sampling flowrates to better gauge the flowrate-dependency of the observed sampling efficiency.

### **Method**

The sampling efficiency of the SASS 3100 was evaluated at four different sampling flowrates (50, 100, 200 and 300 LPM). The aerosol chamber-based sampling efficiency evaluation included two particle sizes (1 and 3  $\mu\text{m}$ ) of BG spores and Uranine as described in “Aerosol chamber-based sampling efficiency evaluation” using manual filter extraction. Four SASS 3100 samplers were used to sample simultaneously at each flowrate 50, 100, 200 and 300 LPM using gelatin filters as a reference. The samplers rotated on sampling at the different flowrates, and a minimum of five experiments were performed at each flowrate under all four test condition. Quantitation was performed as described in “Plate count analysis” and “Fluorimeter analyses”.

### **Results**

The sampling efficiency (%) relative to gelatin reference filters was  $>87\%$  under all test conditions (Supplementary Text 2 Table 1). Based on ANOVA tests, the observed sampling efficiency was not significantly different between any of the evaluated sampling flowrates.

**Supplementary Text 2 Table 1.** Relative sampling efficiency (%) at different flowrates with SASS 3100.

|                                   |                | <b>50 LPM</b> | <b>100 LPM</b> | <b>200 LPM</b> | <b>300 LPM</b> |
|-----------------------------------|----------------|---------------|----------------|----------------|----------------|
| <b>1 <math>\mu\text{m}</math></b> | <b>BG</b>      | 93 $\pm$ 6    | 96 $\pm$ 14    | 95 $\pm$ 14    | 87 $\pm$ 11    |
|                                   | <b>Uranine</b> | 90 $\pm$ 5    | 96 $\pm$ 8     | 93 $\pm$ 16    | 87 $\pm$ 2     |
| <b>3 <math>\mu\text{m}</math></b> | <b>BG</b>      | 92 $\pm$ 11   | 88 $\pm$ 8     | 94 $\pm$ 12    | 88 $\pm$ 12    |
|                                   | <b>Uranine</b> | 91 $\pm$ 9    | 103 $\pm$ 7    | 100 $\pm$ 11   | 88 $\pm$ 6     |

**Figure S1.** Rarefaction curves for the outdoor (A) and subway (B) datasets. Dashed vertical lines indicate the read depth (reads assigned to the species level) to which all samples were rarefied.

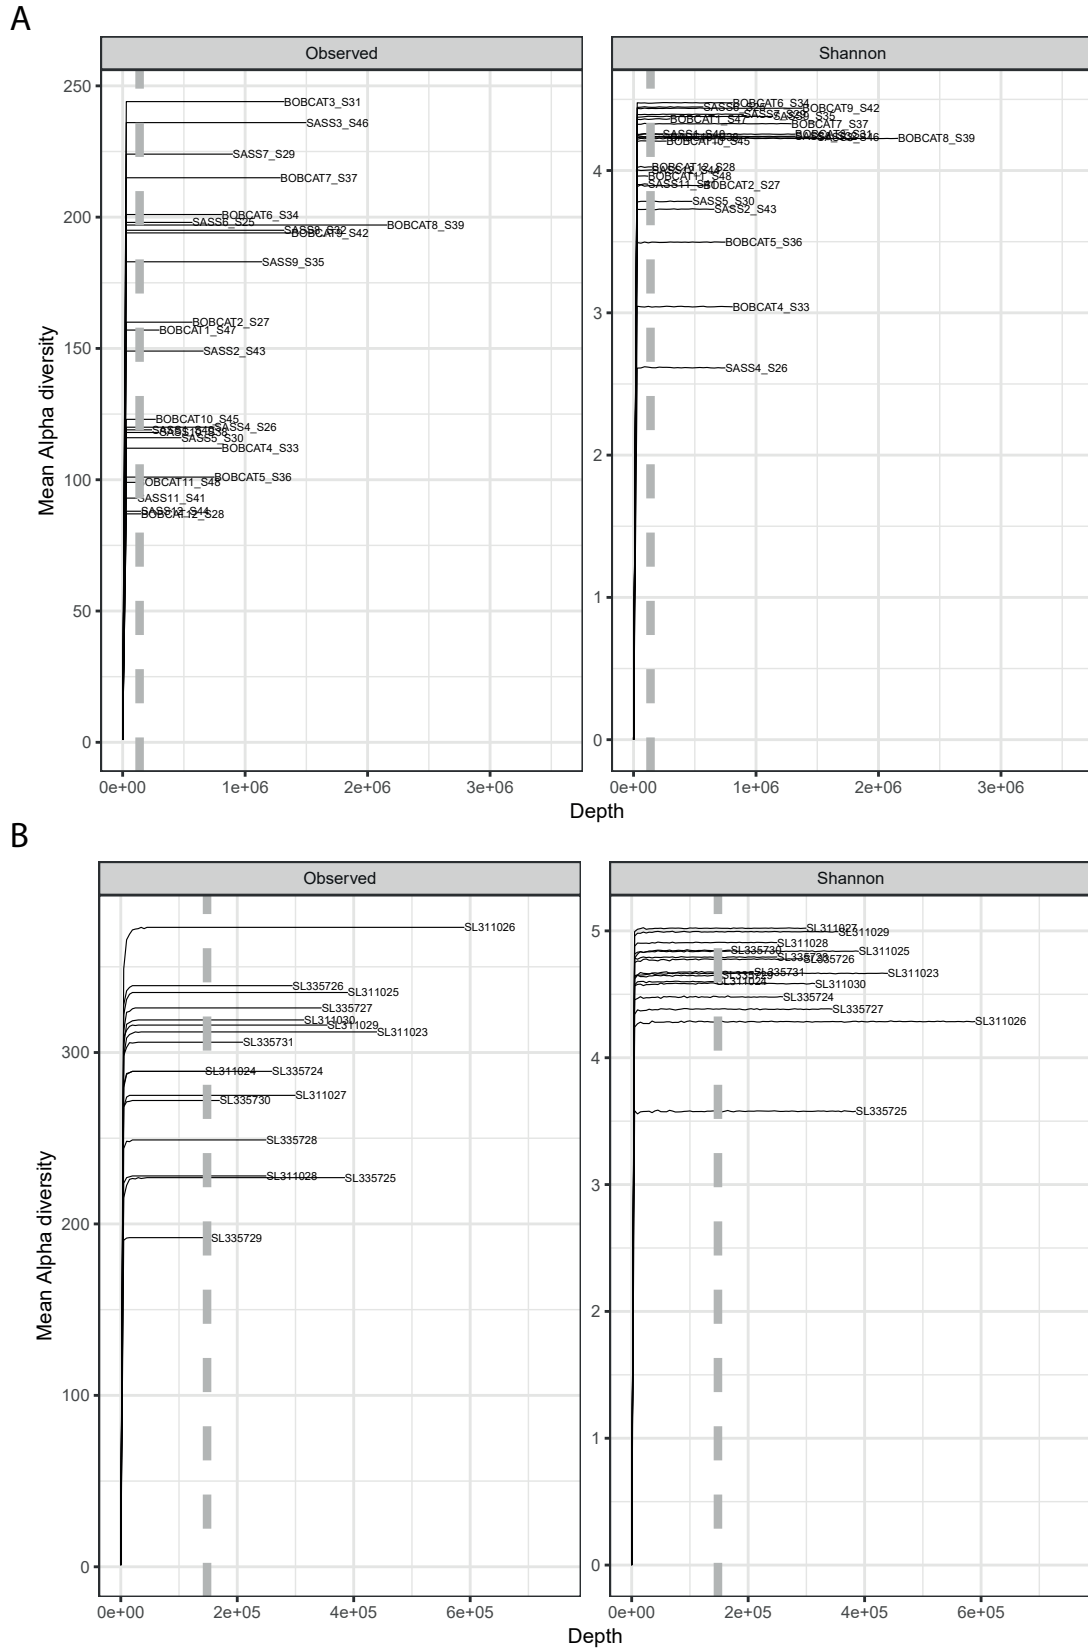

**Figure S2.** Heatmaps showing transformed read counts for all species identified in the outdoor (460 spp) and subway (606 spp) datasets.

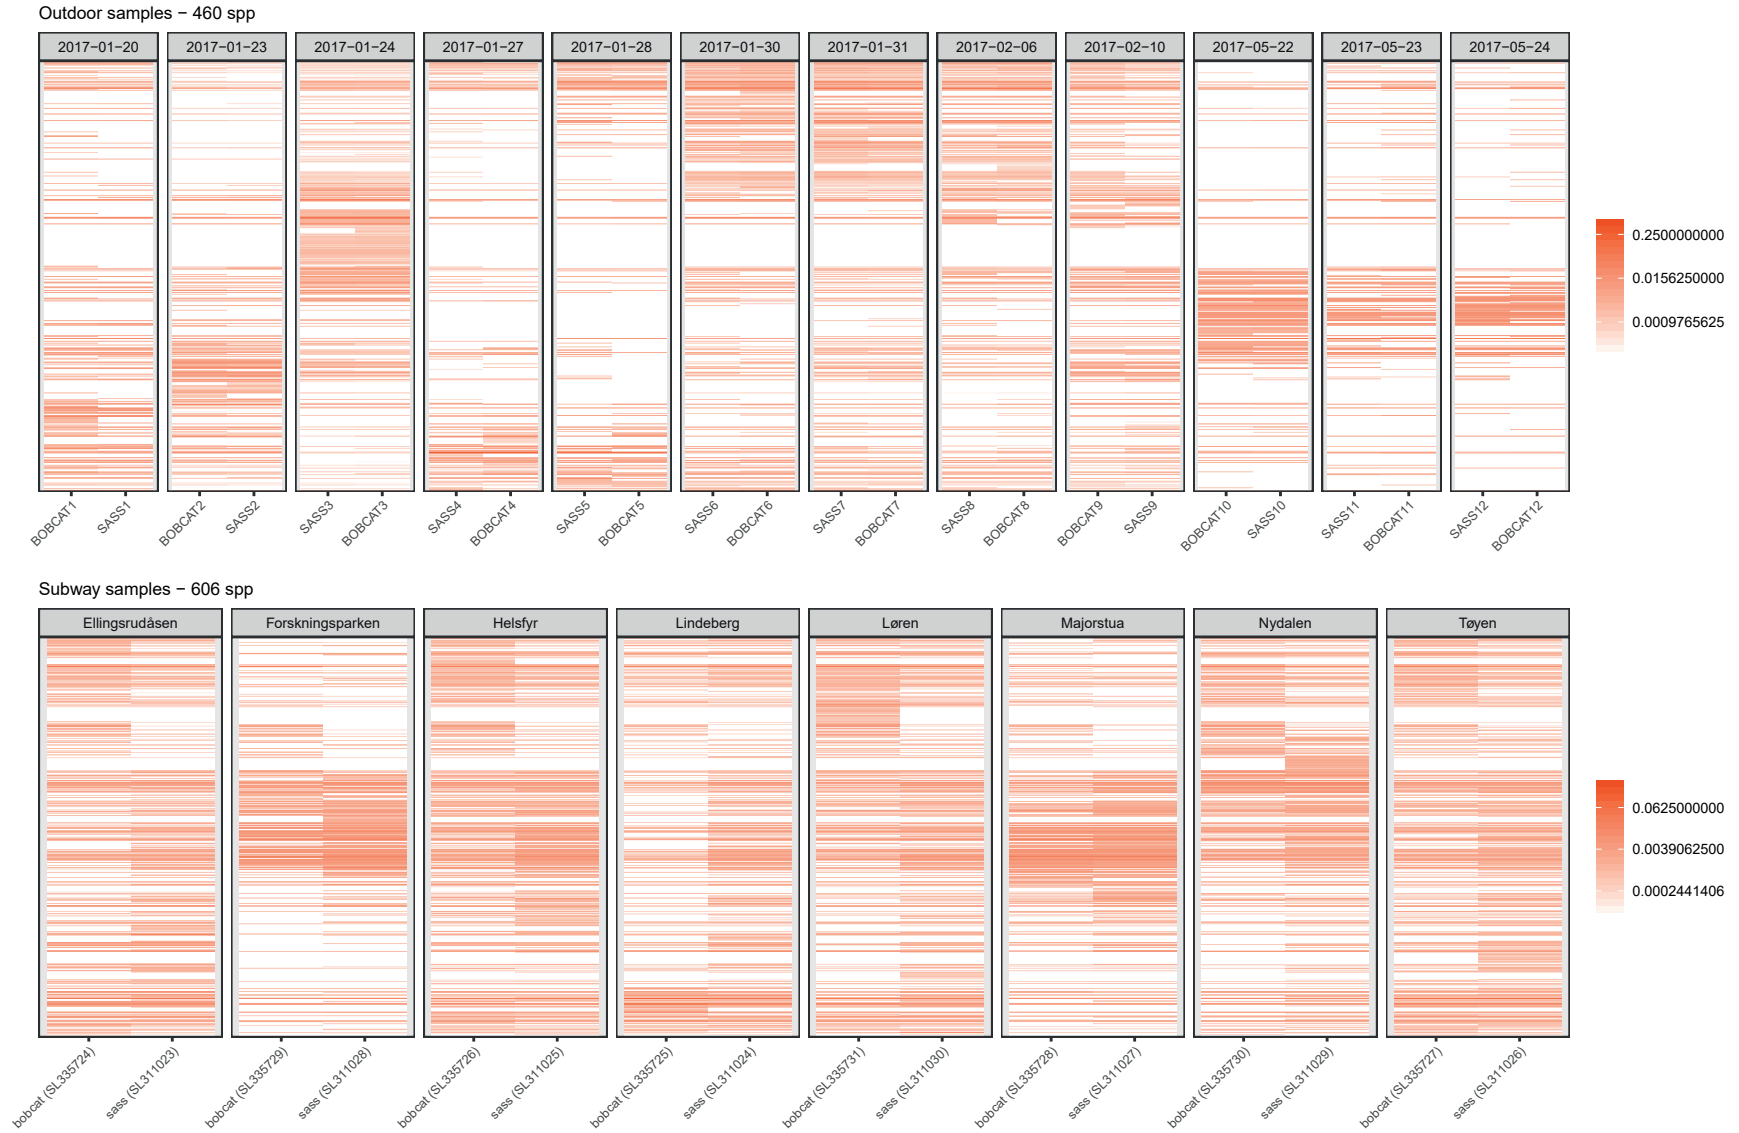



**Table S1.** Particle size distribution for 1 and 3  $\mu\text{m}$  particles (droplet nuclei) aerosolized using 120- and 48-kHz ultrasonic atomizer nozzles, respectively, from spray liquid containing mixture of *Bacillus atrophaeus* (BG) spores and Uranine. Particle size distribution was calculated based on APS 3321 aerodynamic particle sizer measurements from five or more aerosol experiments and reported as mean ( $\pm$  standard deviation) count median aerodynamic diameter ( $\mu\text{m}$ ) and geometric standard deviation (unitless).

| Aerosol generator (targeted particle size)                      | Particle size distribution                                                                  |                                                                              |
|-----------------------------------------------------------------|---------------------------------------------------------------------------------------------|------------------------------------------------------------------------------|
|                                                                 | Count median aerodynamic diameter (CMAD)<br>(mean $\pm$ standard deviation, $\mu\text{m}$ ) | Geometric standard deviation (GSD) (mean $\pm$ standard deviation, unitless) |
| 120-kHz ultrasonic atomizer nozzle (~1 $\mu\text{m}$ particles) | 1.07 $\pm$ 0.01                                                                             | 1.41 $\pm$ 0.01                                                              |
| 48-kHz ultrasonic atomizer nozzle (~3 $\mu\text{m}$ particles)  | 2.99 $\pm$ 0.05                                                                             | 1.26 $\pm$ 0.01                                                              |

**Table S2.** Metadata outdoor air sampling campaign. Twelve paired air samples were collected side-by-side with SASS 3100 and ACD-200 Bobcat in a semi-suburban outdoor environment (Kjeller, Norway, 59.976540N, 11.048691E) between January-May 2017. Air sampling was performed for a period of 6-8 hours with the samplers mounted on tripods with an inlet height of ~1.5 meters. SASS and Bobcat were operated at a sampling flowrate of 300 and 200 liters of air per minute (LPM), respectively.

| Date       | Time of day | Meteorological conditions |        |                    |                  |                            | SASS 3100 Yield                 |                                                   | Shotgun metagenomic sequencing (read statistics) |                                                                        |                                                             | Alpha Diversity (species) |                   | ACD-200 Bobcat Yield            |                                                   | Shotgun metagenomic sequencing (read statistics) |                                                                   |                                                     | Alpha Diversity |                   |
|------------|-------------|---------------------------|--------|--------------------|------------------|----------------------------|---------------------------------|---------------------------------------------------|--------------------------------------------------|------------------------------------------------------------------------|-------------------------------------------------------------|---------------------------|-------------------|---------------------------------|---------------------------------------------------|--------------------------------------------------|-------------------------------------------------------------------|-----------------------------------------------------|-----------------|-------------------|
|            |             | Temp (°C)                 | RH (%) | Precipitation (mm) | Wind speed (m/s) | Wind direction (wind from) | Total DNA (pg m <sup>-3</sup> ) | Bacterial 16S rRNA gene (copies m <sup>-3</sup> ) | Raw reads (150 bp, paired)                       | Quality filtered reads (≥Q20, ≥100 bp, PhiX and human removed, paired) | Classified reads (KrakenUniq, NCBI RefSeq database, paired) | Shannon Index             | Observed Richness | Total DNA (pg m <sup>-3</sup> ) | Bacterial 16S rRNA gene (copies m <sup>-3</sup> ) | Raw reads (150 bp, split pairs)                  | Quality filtered reads (≥Q20 and ≥100 bp), PhiX and human removed | Classified reads (KrakenUniq, NCBI RefSeq database) | Shannon Index   | Observed Richness |
| 20.01.2017 | 08:20-15:20 | 6.3±1.9                   | 60±6   | 0                  | 1.9±0.7          | West                       | 52                              | 4 319                                             | 12 337 993                                       | 7 823 604                                                              | 685 494                                                     | 4,256                     | 119               | 34                              | 2 750                                             | 10 729 895                                       | 6 837 695                                                         | 717 589                                             | 4,367           | 157               |
| 23.01.2017 | 08:20-16:20 | -0.8±1.3                  | 73±8   | 0                  | 1.2±1.3          | South                      | 13                              | 1 255                                             | 12 424 466                                       | 7 876 624                                                              | 1 220 753                                                   | 3,727                     | 149               | 16                              | 2 085                                             | 10 581 444                                       | 6 750 599                                                         | 1 094 393                                           | 3,896           | 160               |
| 24.01.2017 | 09:40-15:40 | -6.0±2.3                  | 93±2   | 0                  | 0.0±0.0          | South                      | 347                             | 95 601                                            | 13 500 418                                       | 8 679 882                                                              | 2 395 128                                                   | 4,234                     | 236               | 251                             | 86 041                                            | 11 074 628                                       | 7 364 197                                                         | 2 087 043                                           | 4,261           | 244               |
| 27.01.2017 | 08:10-16:10 | 0.4±0.2                   | 97±2   | 0                  | 0.5±0.6          | South-West                 | 7                               | 1 340                                             | 9 567 532                                        | 6 427 590                                                              | 1 367 842                                                   | 2,610                     | 120               | 10                              | 2 039                                             | 12 797 639                                       | 8 680 209                                                         | 1 648 233                                           | 3,044           | 112               |
| 28.01.2017 | 11:20-17:50 | 0.2±0.3                   | 87±3   | 0                  | 1.5±0.4          | South                      | 7                               | 2 198                                             | 11 425 585                                       | 7 983 164                                                              | 1 229 183                                                   | 3,777                     | 116               | 6                               | 2 414                                             | 15 307 536                                       | 10 576 813                                                        | 1 980 462                                           | 3,496           | 101               |
| 30.01.2017 | 08:20-16:10 | -6.0±2.3                  | 88±4   | 0.05               | 1.5±0.5          | North-West                 | 23                              | 9 260                                             | 10 155 534                                       | 6 717 164                                                              | 1 036 618                                                   | 4,438                     | 198               | 28                              | 12 085                                            | 14 421 435                                       | 9 462 981                                                         | 1 457 029                                           | 4,477           | 201               |
| 31.01.2017 | 08:20-16:20 | -1.4±0.7                  | 92±2   | 0                  | 1.4±0.4          | North                      | 27                              | 10 986                                            | 11 277 740                                       | 7 260 346                                                              | 1 513 678                                                   | 4,397                     | 224               | 28                              | 13 125                                            | 14 181 509                                       | 9 516 845                                                         | 2 121 891                                           | 4,320           | 215               |
| 06.02.2017 | 08:00-17:00 | -0.5±0.6                  | 79±6   | 0                  | 4.1±1.2          | East                       | 16                              | 6 513                                             | 15 566 927                                       | 10 273 901                                                             | 2 197 900                                                   | 4,249                     | 195               | 22                              | 10 013                                            | 24 426 205                                       | 16 342 682                                                        | 3 530 854                                           | 4,219           | 197               |
| 10.02.2017 | 09:00-15:15 | -4.3±0.4                  | 86±3   | 0.1                | 3.8±0.4          | North-East                 | 18                              | 4 853                                             | 19 227 002                                       | 12 380 516                                                             | 2 238 452                                                   | 4,383                     | 183               | 27                              | 7 233                                             | 19 837 152                                       | 13 034 122                                                        | 2 551 770                                           | 4,432           | 194               |
| 22.05.2017 | 08:45-16:45 | 15.3±1.5                  | 49±7   | 0                  | 2.4±1.0          | South-West                 | 103                             | 24 390                                            | 12 607 714                                       | 8 354 842                                                              | 945 334                                                     | 4,234                     | 118               | 122                             | 27 270                                            | 11 059 366                                       | 7 402 821                                                         | 864 601                                             | 4,209           | 123               |
| 23.05.2017 | 08:25-16:25 | 15.6±2.6                  | 51±8   | 0                  | 2.4±1.1          | East                       | 112                             | 19 213                                            | 9 136 784                                        | 5 909 297                                                              | 474 685                                                     | 3,902                     | 93                | 104                             | 20 015                                            | 9 579 232                                        | 6 457 475                                                         | 519 945                                             | 3,964           | 99                |
| 24.05.2017 | 08:40-16:40 | 18.6±2.9                  | 43±9   | 0                  | 2.4±1.0          | South                      | 97                              | 17 548                                            | 12 088 280                                       | 8 036 780                                                              | 714 870                                                     | 4,009                     | 88                | 120                             | 25 557                                            | 11 057 410                                       | 7 729 469                                                         | 699 871                                             | 4,028           | 87                |



**Table S3.** Metadata subway air sampling campaign. Eight paired air samples were collected side-by-side using SASS 3100 and ACD-200 Bobcat in the Oslo subway system on 21st June 2017. Each sample was collected for 30 minutes with the air samplers mounted on tripods with an inlet height of ~1.5 meters. SASS and Bobcat were operated at a sampling flowrate of 300 and 200 liters of air per minute (LPM), respectively.

| Location         | Time of day | Latitude | Longitude | Meteorological conditions |        | SASS 3100                             |                                                  |                                                                        |                                                             |                           | ACD-200 Bobcat    |                                       |                                                  |                                                                        |                                                             |                           |                   |
|------------------|-------------|----------|-----------|---------------------------|--------|---------------------------------------|--------------------------------------------------|------------------------------------------------------------------------|-------------------------------------------------------------|---------------------------|-------------------|---------------------------------------|--------------------------------------------------|------------------------------------------------------------------------|-------------------------------------------------------------|---------------------------|-------------------|
|                  |             |          |           | Temp (°C)                 | RH (%) | Yield Total DNA (pg m <sup>-3</sup> ) | Shotgun metagenomic sequencing (read statistics) |                                                                        |                                                             | Alpha Diversity (species) |                   | Yield Total DNA (pg m <sup>-3</sup> ) | Shotgun metagenomic sequencing (read statistics) |                                                                        |                                                             | Alpha Diversity (species) |                   |
|                  |             |          |           |                           |        |                                       | Raw reads (150 bp, paired)                       | Quality filtered reads (≥Q20, ≥100 bp, PhiX and human removed, paired) | Classified reads (KrakenUniq, NCBI RefSeq database, paired) | Shannon Index             | Observed Richness |                                       | Raw reads (150 bp, paired)                       | Quality filtered reads (≥Q20, ≥100 bp, PhiX and human removed, paired) | Classified reads (KrakenUniq, NCBI RefSeq database, paired) | Shannon Index             | Observed Richness |
| Ellingsrudåsen   | 09:00-09:30 | 59,93651 | 10,91664  | 19.0±0.2                  | 60±1   | 182                                   | 4 060 760                                        | 2 993 878                                                              | 790 624                                                     | 4,653                     | 312               | 432                                   | 4 167 195                                        | 2 394 912                                                              | 496 220                                                     | 4,481                     | 289               |
| Lindeberg        | 09:40-10:10 | 59,93276 | 10,88167  | 15.3±0.3                  | 54±8   | 274                                   | 3 549 641                                        | 1 256 016                                                              | 267 985                                                     | 4,597                     | 289               | 592                                   | 4 223 095                                        | 2 391 942                                                              | 599 788                                                     | 3,577                     | 227               |
| Helsfyr          | 10:27-10:57 | 59,91259 | 10,80139  | 19.4±0.7                  | 41±4   | 296                                   | 4 040 722                                        | 2 903 645                                                              | 721 566                                                     | 4,842                     | 335               | 532                                   | 4 691 367                                        | 2 556 796                                                              | 553 935                                                     | 4,789                     | 339               |
| Tøyen            | 11:07-11:37 | 59,91558 | 10,7758   | 20.6±0.4                  | 54±2   | 279                                   | 4 035 098                                        | 2 932 510                                                              | 938 119                                                     | 4,281                     | 373               | 632                                   | 4 552 661                                        | 2 457 036                                                              | 595 458                                                     | 4,390                     | 326               |
| Majorstua        | 11:53-12:23 | 59,93016 | 10,71473  | 19.1±0.6                  | 35±1   | 391                                   | 3 427 688                                        | 2 651 652                                                              | 611 492                                                     | 5,022                     | 275               | 618                                   | 4 246 963                                        | 2 624 188                                                              | 549 341                                                     | 4,792                     | 249               |
| Forskningsparken | 12:35-13:05 | 59,9437  | 10,72088  | 20.0±0.7                  | 36±1   | 222                                   | 3 404 937                                        | 2 722 437                                                              | 570 677                                                     | 4,907                     | 228               | 292                                   | 3 898 530                                        | 2 682 657                                                              | 381 159                                                     | 4,649                     | 192               |
| Nydalen          | 13:18-13:48 | 59,9494  | 10,76592  | 19.1±0.3                  | 39±2   | 309                                   | 3 866 835                                        | 2 856 383                                                              | 703 427                                                     | 4,996                     | 316               | 573                                   | 3 564 427                                        | 2 026 702                                                              | 374 922                                                     | 4,846                     | 272               |
| Løren            | 14:10-14:40 | 59,9301  | 10,78959  | 16.3±0.3                  | 57±2   | 89                                    | 3 670 661                                        | 2 373 638                                                              | 580 728                                                     | 4,589                     | 319               | 192                                   | 3 691 910                                        | 2 002 173                                                              | 406 300                                                     | 4,677                     | 306               |
